# Supplementary material for: Association of mean platelet volume with incident type 2 diabetes mellitus risk: the Dongfeng–Tongji cohort study
Source: PubMed Central journal article supplement (PMC5894209; doi:10.1186/s13098-018-0333-6), 2018-04-10
Supplement: 13098_2018_333_MOESM1_ESM.pdf [file 13098_2018_333_MOESM1_ESM.pdf]

**Table S1 Baseline characteristics of the study population in women and men**

| Variables                                  | Female (n=8029) |               |               |               | P value | Males (n=5980) |               |               |               | P value |
|--------------------------------------------|-----------------|---------------|---------------|---------------|---------|----------------|---------------|---------------|---------------|---------|
|                                            | MPV(fL)         |               |               |               |         | MPV(fL)        |               |               |               |         |
|                                            | Q1              | Q2            | Q3            | Q4            |         | Q1             | Q2            | Q3            | Q4            |         |
| <b>Participants</b>                        | <7.50           | 7.50-8.50     | 8.50-9.80     | ≥9.80         |         | <7.40          | 7.40-8.33     | 8.33-9.52     | ≥9.52         |         |
|                                            | 2037            | 1980          | 2036          | 1976          |         | 1501           | 1498          | 1493          | 1488          |         |
| <b>Age, years</b>                          | 59.57(7.10)     | 59.80(7.61)   | 60.12(7.77)   | 59.75(7.81)   | 0.376   | 65.71(6.70)    | 65.76(6.87)   | 65.21(6.74)   | 65.26(6.78)   | 0.04    |
| <b>Education, %</b>                        |                 |               |               |               | 0.593   |                |               |               |               | 0.18    |
| <b>Primary or below</b>                    | 27.5            | 27.4          | 26.1          | 28.9          |         | 30.0           | 29.9          | 28.0          | 31.9          |         |
| <b>Junior high school</b>                  | 37.6            | 38.1          | 39.0          | 36.4          |         | 35.8           | 34.4          | 34.8          | 35.2          |         |
| <b>High school</b>                         | 28.6            | 27.9          | 28.0          | 27.6          |         | 22             | 21.8          | 23.0          | 18.9          |         |
| <b>College or above</b>                    | 6.2             | 6.6           | 7.0           | 7.1           |         | 12.2           | 13.9          | 14.2          | 14.1          |         |
| <b>Body mass index, kg/m<sup>2</sup></b>   | 24.37(3.62)     | 24.11(3.39)   | 24.00(3.31)   | 23.97(3.31)   | 0.008   | 24.11(3.28)    | 24.07(3.29)   | 24.10(3.07)   | 24.14(3.07)   | 0.976   |
| <b>Smoking (yes, %)</b>                    | 2.4             | 2.0           | 2.5           | 2.0           | 0.645   | 41.6           | 43.8          | 41.2          | 40.0          | 0.211   |
| <b>Drinking (yes, %)</b>                   | 7.5             | 6.6           | 6.7           | 7.2           | 0.584   | 44.0           | 43.8          | 44.7          | 43.5          | 0.925   |
| <b>Physical activity (yes, %)</b>          | 87.9            | 87.2          | 88.5          | 88.8          | 0.411   | 88.6           | 87.7          | 90.5          | 91.8          | 0.001   |
| <b>Family history of diabetes (yes, %)</b> | 6.0             | 5.9           | 5.6           | 4.4           | 0.056   | 1.8            | 1.8           | 1.7           | 1.5           | 0.934   |
| <b>Hypertension (yes, %)</b>               | 24.5            | 22.9          | 22.6          | 23.2          | 0.791   | 28.5           | 24.6          | 27.6          | 26.2          | 0.093   |
| <b>Hyperlipidemia (yes, %)</b>             | 12.3            | 13.3          | 13.6          | 13.2          | 0.890   | 13.5           | 15.0          | 15.5          | 13.0          | 0.217   |
| <b>Incident diabetes (yes, %)</b>          | 7.2             | 7.1           | 7.5           | 6.9           | 0.147   | 6.0            | 6.7           | 7.9           | 7.5           | 0.365   |
| <b>Menopause (yes, %)</b>                  | 10.5            | 12.5          | 10.6          | 12.3          | 0.085   | -              | -             | -             | -             | -       |
| <b>Systolic blood pressure (mmHg)</b>      | 126.27(18.26)   | 125.58(18.58) | 124.55(18.11) | 126.36(18.87) | 0.006   | 130.34(18.62)  | 129.24(17.96) | 129.67(18.23) | 128.70(18.24) | 0.093   |
| <b>Diastolic blood pressure (mmHg)</b>     | 78.29(10.44)    | 76.74(10.79)  | 75.88(10.44)  | 77.01(10.68)  | <0.001  | 79.36(11.27)   | 77.89(10.66)  | 77.77(11.14)  | 77.25(11.08)  | <0.001  |

|                                       |               |               |               |               |        |               |               |               |               |        |
|---------------------------------------|---------------|---------------|---------------|---------------|--------|---------------|---------------|---------------|---------------|--------|
| <b>Total cholesterol (mmol/L)</b>     | 5.32(0.89)    | 5.34(0.96)    | 5.33(0.98)    | 5.25(0.92)    | 0.042  | 4.99(0.86)    | 4.98(0.86)    | 4.96(0.89)    | 4.89(0.88)    | 0.007  |
| <b>Triglycerides (mmol/L)</b>         | 1.38(0.79)    | 1.37(1.05)    | 1.37(0.99)    | 1.41(0.92)    | 0.534  | 1.32(0.93)    | 1.28(0.80)    | 1.31(0.89)    | 1.29(0.79)    | 0.693  |
| <b>HDL-cholesterol (mmol/L)</b>       | 1.45(0.39)    | 1.45(0.37)    | 1.54(0.40)    | 1.58(0.46)    | <0.001 | 1.42(0.38)    | 1.34(0.35)    | 1.39(0.40)    | 1.46(0.43)    | <0.001 |
| <b>LDL-cholesterol (mmol/L)</b>       | 3.11(0.78)    | 3.17(0.81)    | 3.06(0.77)    | 2.96(0.77)    | <0.001 | 2.93(0.80)    | 3.01(0.76)    | 2.95(1.07)    | 2.84(0.76)    | <0.001 |
| <b>Fasting blood glucose (mmol/L)</b> | 5.48(0.54)    | 5.49(0.52)    | 5.49(0.57)    | 5.43(0.61)    | 0.064  | 5.58(0.55)    | 5.62(0.56)    | 5.59(0.59)    | 5.47(0.66)    | <0.001 |
| <b>Mean platelet volume, fL</b>       | 6.81(0.56)    | 8.03(0.29)    | 9.11(0.37)    | 11.28(1.46)   | <0.001 | 6.75(0.53)    | 7.88(0.26)    | 8.89(0.35)    | 11.02(1.52)   | <0.001 |
| <b>Platelet counts, 10E9/L</b>        | 209.59(55.52) | 203.86(53.10) | 197.43(54.16) | 176.87(50.30) | <0.001 | 189.63(56.02) | 189.29(51.45) | 180.85(51.17) | 164.45(51.25) | <0.001 |
| <b>White blood cell count, 10E9/L</b> | 5.43(1.49)    | 5.57(1.39)    | 5.80(1.48)    | 5.82(1.62)    | 0.001  | 5.99(2.30)    | 6.21(1.64)    | 6.27(1.55)    | 6.32(1.58)    | <0.001 |

Continuous variables were presented as mean (SD). Dichotomous variables were presented as n (%).
