# Supplementary material for: Association of mean platelet volume with incident type 2 diabetes mellitus risk: the Dongfeng–Tongji cohort study
Source: PubMed Central journal article supplement (PMC5894209; doi:10.1186/s13098-018-0333-6), 2018-04-10
Supplement: 13098_2018_333_MOESM3_ESM.pdf [file 13098_2018_333_MOESM3_ESM.pdf]

**Table S3 Hazard ratios of T2DM incidence for MPV stratified by characteristics relevant to MPV**

|                        | n <sup>#</sup> | MPV quartile |                 |                 |                 | P for trend * | P for interaction |
|------------------------|----------------|--------------|-----------------|-----------------|-----------------|---------------|-------------------|
|                        |                | Q1           | Q2              | Q3              | Q4              |               |                   |
| Age, years             |                |              |                 |                 |                 |               | 0.073             |
| <60                    | 5075           | Ref          | 1.53(0.98,2.83) | 1.66(1.08,2.56) | 2.07(1.27,3.37) | 0.006         |                   |
| ≥60                    | 8934           | Ref          | 1.35(1.03,1.77) | 0.93(0.69,1.24) | 1.11(0.81,1.53) | 0.87          |                   |
| Gender                 |                |              |                 |                 |                 |               | 0.017             |
| Male                   | 5980           | Ref          | 1.40(0.99,1.97) | 0.84(0.59,1.18) | 1.25(0.85,1.84) | 0.71          |                   |
| Female                 | 8025           | Ref          | 1.40(1.02,1.93) | 1.47(1.05,2.05) | 1.56(1.07,2.53) | 0.05          |                   |
| BMI, kg/m <sup>2</sup> |                |              |                 |                 |                 |               | 0.429             |
| <25                    | 8673           | Ref          | 1.64(1.15,2.33) | 1.41(0.98,2.05) | 1.68(1.11,2.54) | 0.45          |                   |
| ≥25                    | 5158           | Ref          | 1.22(0.90,1.65) | 1.00(0.73,1.37) | 1.23(0.87,1.75) | 0.32          |                   |
| Current Smoking        |                |              |                 |                 |                 |               | 0.013             |
| No                     | 11231          | Ref          | 1.40(1.08,1.82) | 1.31(1.00,1.71) | 1.58(1.17,2.13) | 0.01          |                   |
| Yes                    | 2670           | Ref          | 1.67(0.94,2.97) | 0.68(0.40,1.16) | 0.95(0.52,1.71) | 0.23          |                   |
| Current Drinking       |                |              |                 |                 |                 |               | 0.428             |
| No                     | 10800          | Ref          | 1.16(0.91,1.48) | 0.98(0.77,1.25) | 1.19(0.93,1.51) | 0.33          |                   |
| Yes                    | 3192           | Ref          | 1.69(1.09,2.63) | 1.25(0.79,1.96) | 1.41(0.89,2.23) | 0.43          |                   |
| Hypertension           |                |              |                 |                 |                 |               | 0.972             |
| No                     | 10520          | Ref          | 1.49(1.11,1.99) | 1.20(0.89,1.62) | 1.49(1.06,2.08) | 0.29          |                   |
| Yes                    | 3469           | Ref          | 1/28(0.87,1.89) | 1.10(0.74,1.65) | 1.37(0.88,2.16) | 0.23          |                   |
| Hyperlipdemia          |                |              |                 |                 |                 |               | 0.670             |
| No                     | 12079          | Ref          | 1.39(1.07,1.82) | 1.13(0.87,1.47) | 1.29(0.97,1.74) | 0.42          |                   |
| Yes                    | 1901           | Ref          | 1.67(0.97,2.86) | 1.29(0.72,2.34) | 2.09(1.08,4.03) | 0.19          |                   |
| WBC counts             |                |              |                 |                 |                 |               | 0.887             |

|                    |      |     |                 |                 |                 |      |       |
|--------------------|------|-----|-----------------|-----------------|-----------------|------|-------|
| < median (5.7E9/L) | 6445 | Ref | 1.27(0.89,1.79) | 1.14(0.78,1.66) | 1.52(1.01,2.29) | 0.07 |       |
| ≥median (5.7E9/L)  | 6254 | Ref | 1.53(1.11,2.09) | 1.18(0.86,1.61) | 1.37(0.97,1.94) | 0.35 |       |
| FBG, mmol/L        |      |     |                 |                 |                 |      | 0.021 |
| <5.6               | 7741 | Ref | 1.56(0.96,2.56) | 1.38(0.79,2.43) | 1.95(1.04,3.69) | 0.06 |       |
| ≥5.6               | 6225 | Ref | 1.28(0.98,1.67) | 1.10(0.84,1.44) | 1.25(0.93,1.67) | 0.31 |       |

Model 3 in Table 2 was used in this analysis.

#: Some characteristics have missing values hence not the same total n for each stratification characteristics.

\*: P value when we assigned the median value to each quartile and entered this as a continuous variable in the model:
